# Supplementary material
Source: PubMed Central journal article supplement (PMC7103116)
Supplement: mmc1.pdf [file mmc1.pdf]

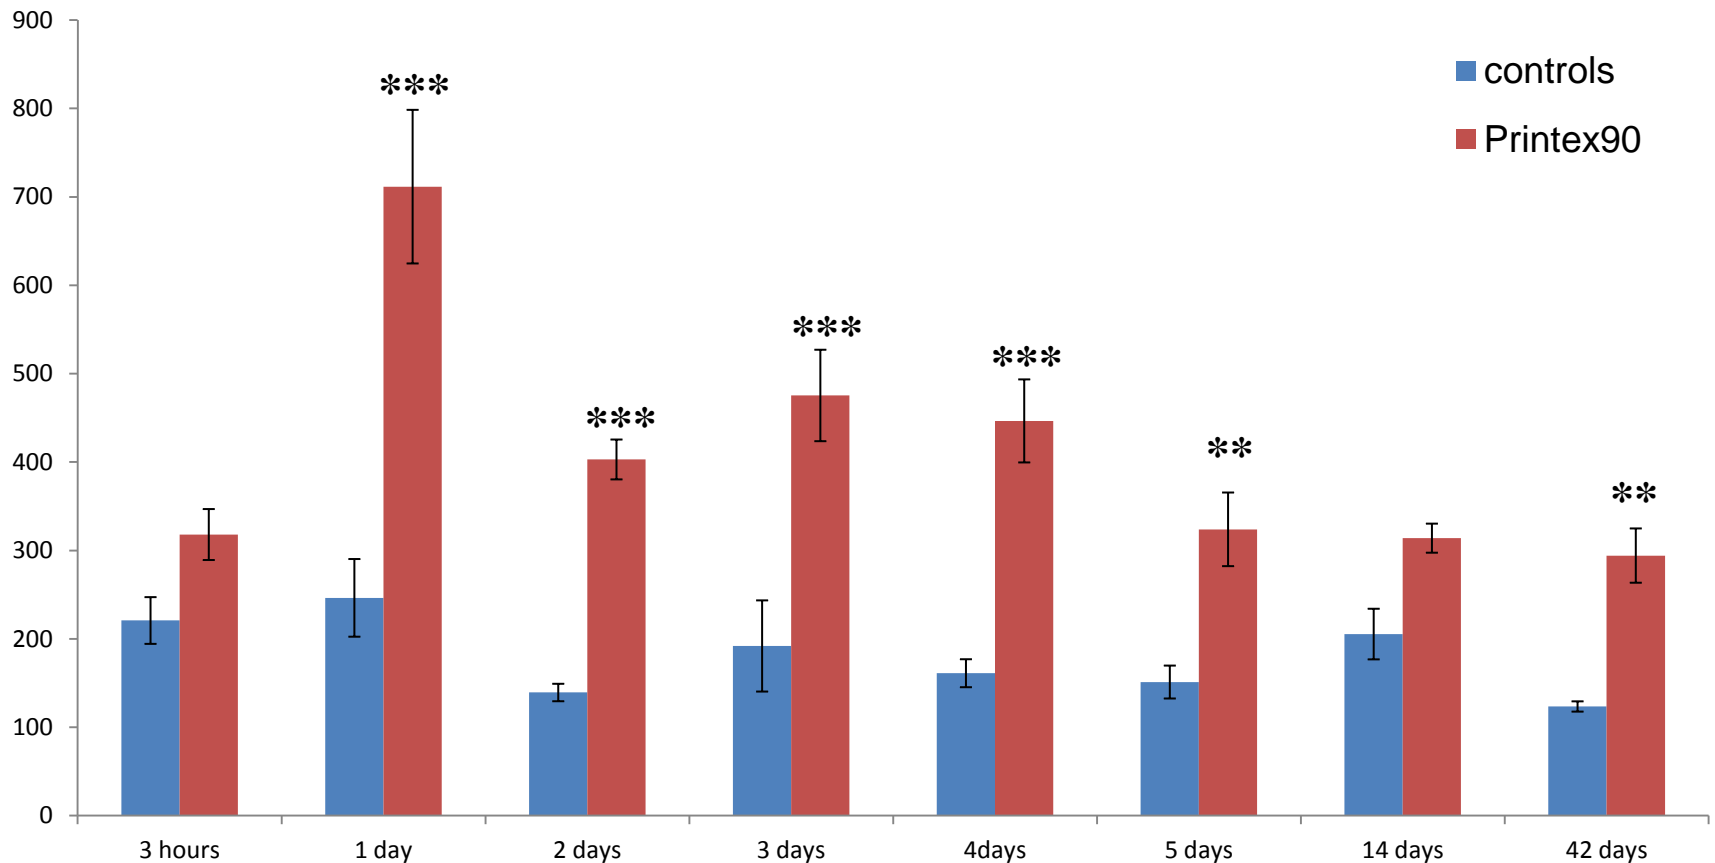

**Figure S1:** Total protein level in BAL fluid following CBNPs exposure. Statistical significance compared to vehicle controls is indicated by \*\*P < 0.01 and \*\*\*P < 0.001, respectively.

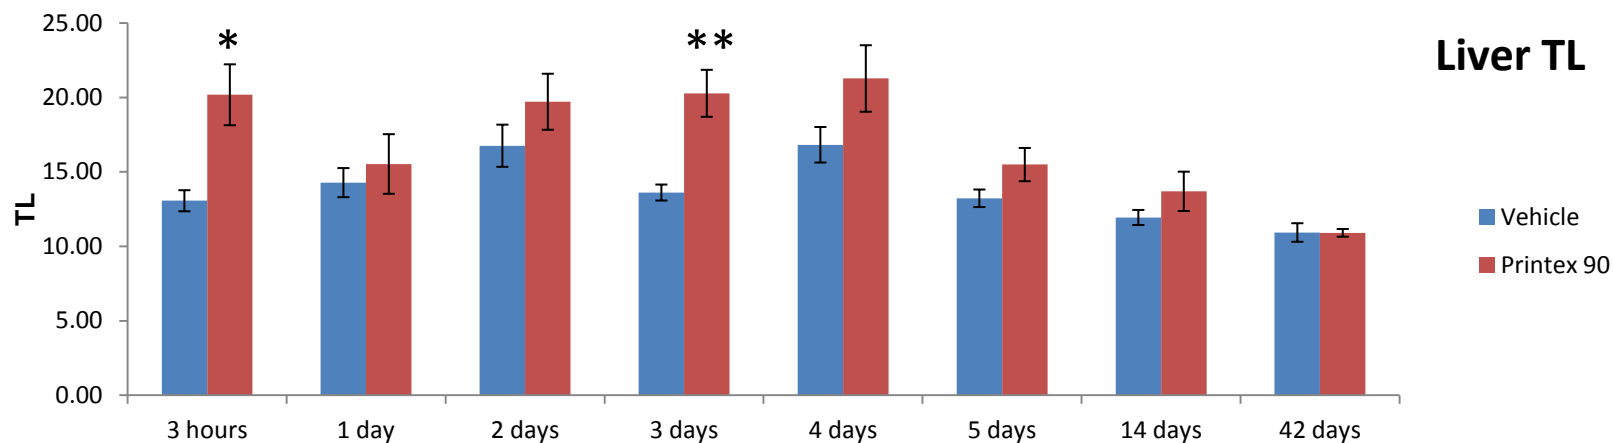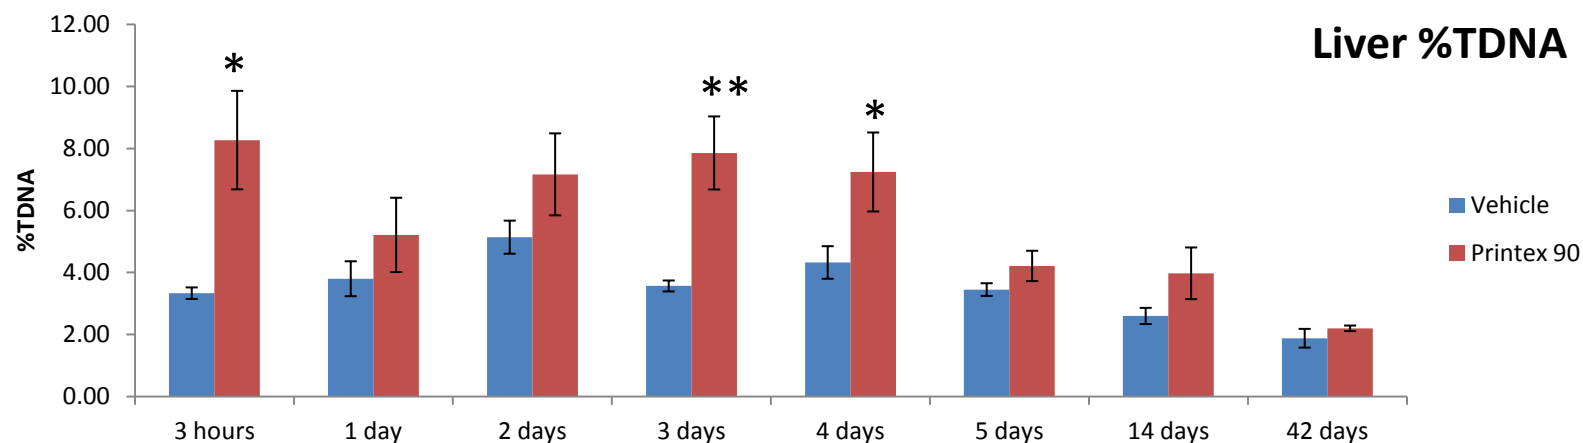

**Figure S2:** DNA strand break in liver expressed as tail length (TL) and %TDNA. Statistical significance compared to vehicle controls is indicated by \* $P < 0.05$  and \*\* $P < 0.01$ , respectively.
