# Supplementary material
Source: PubMed Central journal article supplement (PMC7103116)
Supplement: mmc5.pdf [file mmc5.pdf]

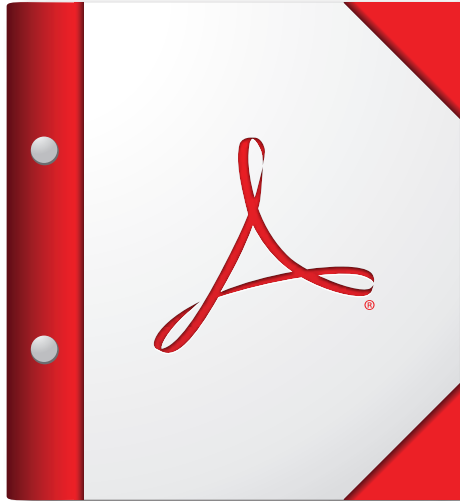

**For the best experience, open this PDF portfolio in  
Acrobat 9 or Adobe Reader 9, or later.**

[Get Adobe Reader Now!](#)
